# Supplementary material
Source: PubMed Central journal article supplement (PMC10873093)
Supplement: NIHMS1929186-supplement-3.pdf [file NIHMS1929186-supplement-3.pdf]

## Supplemental data

### Reconstructing human brown fat developmental trajectory *in vitro*

Jyoti Rao<sup>1,2,3,10</sup>, Yannis Djéffal<sup>1,2,3</sup>, Jerome Chal<sup>1,2,3</sup>, Fabio Marchianò<sup>4</sup>, Chih-Hao Wang<sup>5,11</sup>, Ziad Al Tanoury<sup>1,2,3</sup>, Svetlana Gapon<sup>1,2,3</sup>, Alicia Mayeuf-Louchart<sup>6</sup>, Ian Glass<sup>7</sup>, Elizabeth M. Sefton<sup>8</sup>, Bianca Habermann<sup>4</sup>, Gabrielle Kardon<sup>8</sup>, Fiona M. Watt<sup>9</sup>, Yu-Hua Tseng<sup>5</sup>, Olivier Pourquié<sup>1,2,3</sup>

<sup>1</sup>Department of Pathology, Brigham and Women's Hospital, 60 Fenwood Road, Boston, MA 02115, USA.

<sup>2</sup>Department of Genetics, Harvard Medical School, 60 Fenwood Road, Boston, MA 02115, USA

<sup>3</sup>Harvard Stem Cell Institute, Harvard University, Cambridge, MA 02138, USA

<sup>4</sup>Aix-Marseille University, CNRS, Institut de Biologie du Développement de Marseille UMR 7288, The Turing Center for Living Systems, 13009 Marseille, France

<sup>5</sup>Section on Integrative Physiology and Metabolism, Joslin Diabetes Center, Harvard Medical School, Boston, MA 02215, USA.

<sup>6</sup>Univ. Lille, INSERM, CHU Lille, Institut Pasteur de Lille, U1011-EGID, 59000 Lille, France

<sup>7</sup>Department of Pediatrics, University of Washington School of Medicine, Seattle, WA 98195, USA.

<sup>8</sup>Department of Human Genetics, University of Utah, Salt Lake City 84112, USA<sup>9</sup>King's College London Centre for Stem Cells and Regenerative Medicine, 28th Floor, Tower Wing, Guy's Campus, Great Maze Pond, London SE1 9RT, UK

<sup>10</sup>Current affiliation – Institute of Human Biology (IHB), Roche Pharma Research and Early Development, Roche Innovation Center Basel, Basel 4070, Switzerland

<sup>11</sup>Current affiliation - Graduate Institute of Biomedical Sciences, China Medical University, Taichung, 40402 Taiwan

\*Lead contact – Olivier Pourquié

Lead contact email address - [pourquie@genetics.med.harvard.edu](mailto:pourquie@genetics.med.harvard.edu)

**Figure S1**

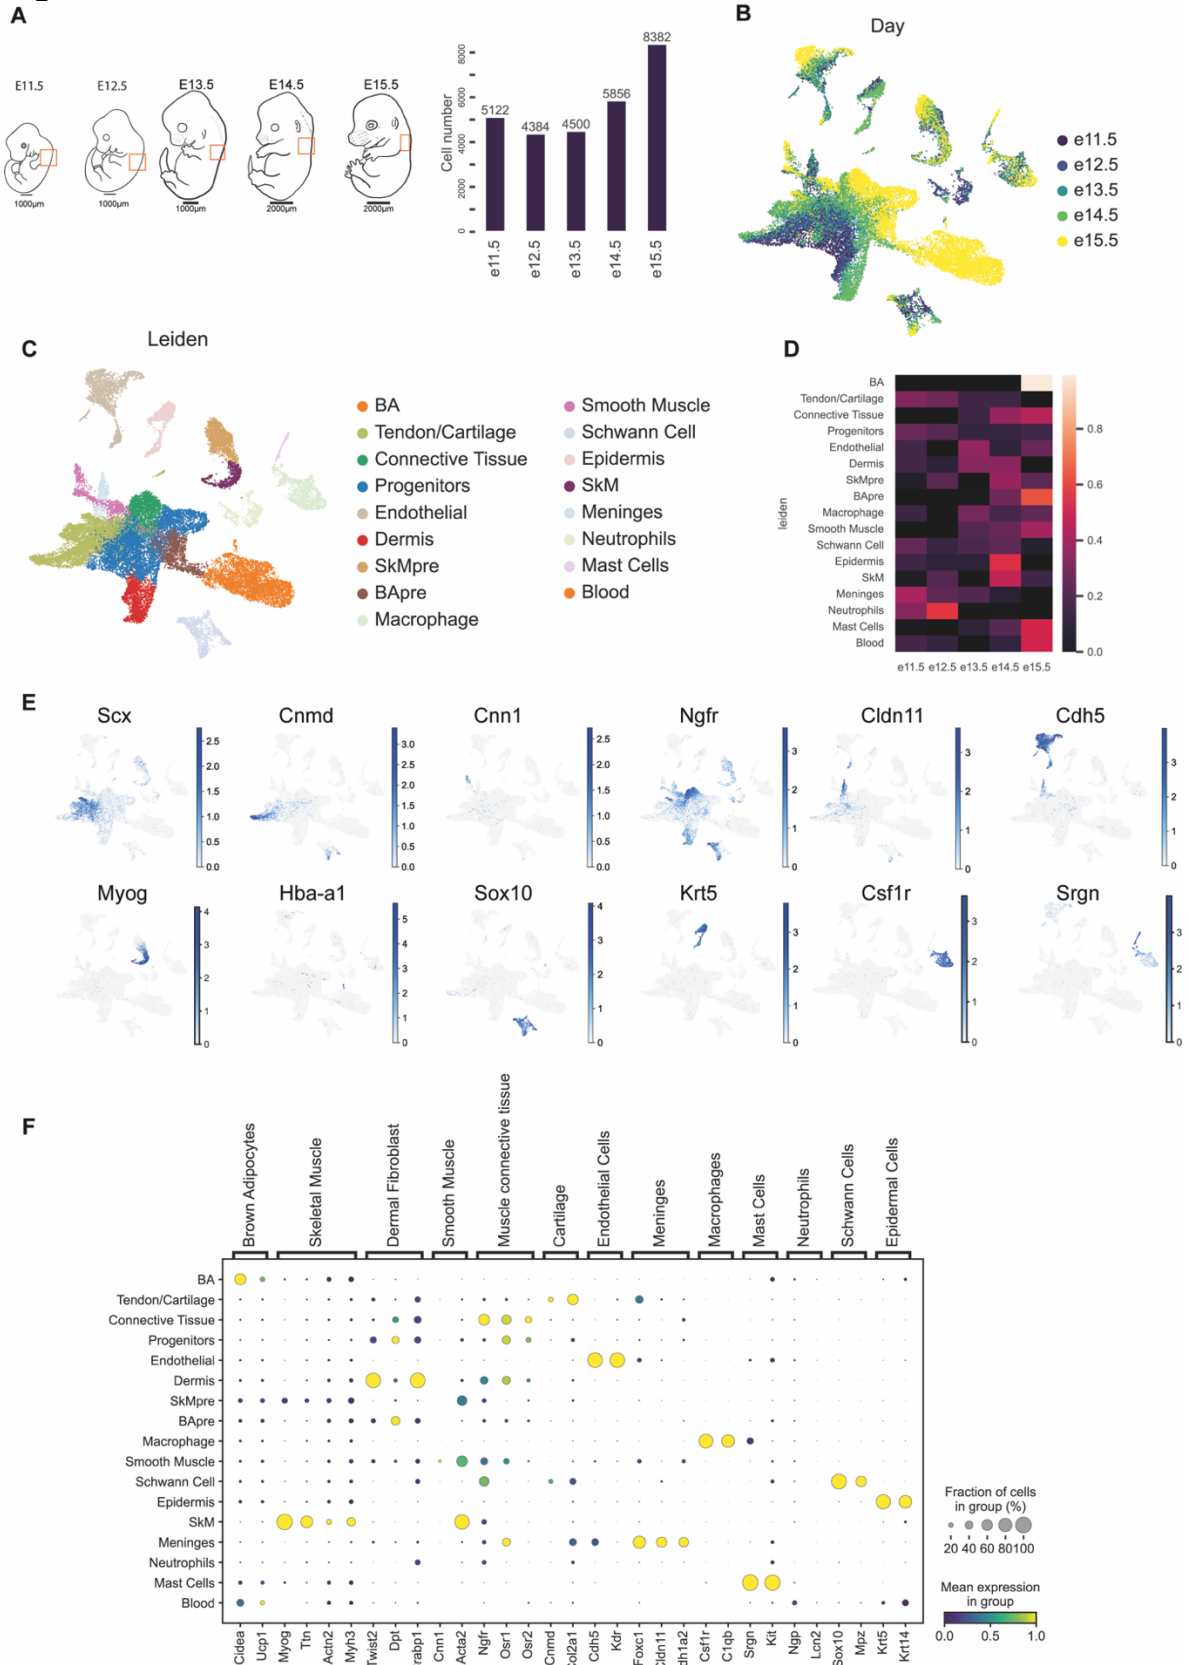

## **Figure S1 – Embryonic development of the mouse interscapular depot**

Related to Figure 1 and Table S1

**A** – Schematic representation of cell isolation strategy for single cell RNA sequencing. Dorsal interscapular region was dissected out with intact dermis and epidermis for embryonic day (E) 13.5 and 14.5. For E15.5, skin and underlying dermis was removed before cell dissociation. For each stage, tissues were isolated from two embryos. Tissues were digested with enzymes followed by encapsulation using inDrops platform. Bar chart showing number of cells isolated from each stage from developing mouse embryos. The number represents sum of two replicates from each time point. E = embryonic day.

**B** – UMAP embedding of the single cells isolated from E11.5, E12.5, E13.5, E14.5 and E15.5 mouse embryos (50 PC dimensions, 28244 cells). Colors indicate embryonic days.

**C** – UMAP embedding showing cell clusters identified using Leiden based clustering on E11.5, E12.5, E13.5, E14.5, E15.5 mouse embryonic single cell data. Colors indicate identified cell cluster (BA=BAs, BAPre=BA precursors, SkM=skeletal muscle, SkMpre=skeletal muscle precursors).

**D** – Normalized confusion matrix showing contribution of cells from different time point to identified clusters.

**E** – UMAP embedding showing expression of a curated list of cluster-specific genes. Scale represents log-normalized transcript counts.

**F** – Dotplot showing expression of a curated list of cluster-specific genes. Scale represents log-normalized transcript counts.

**Figure S2**

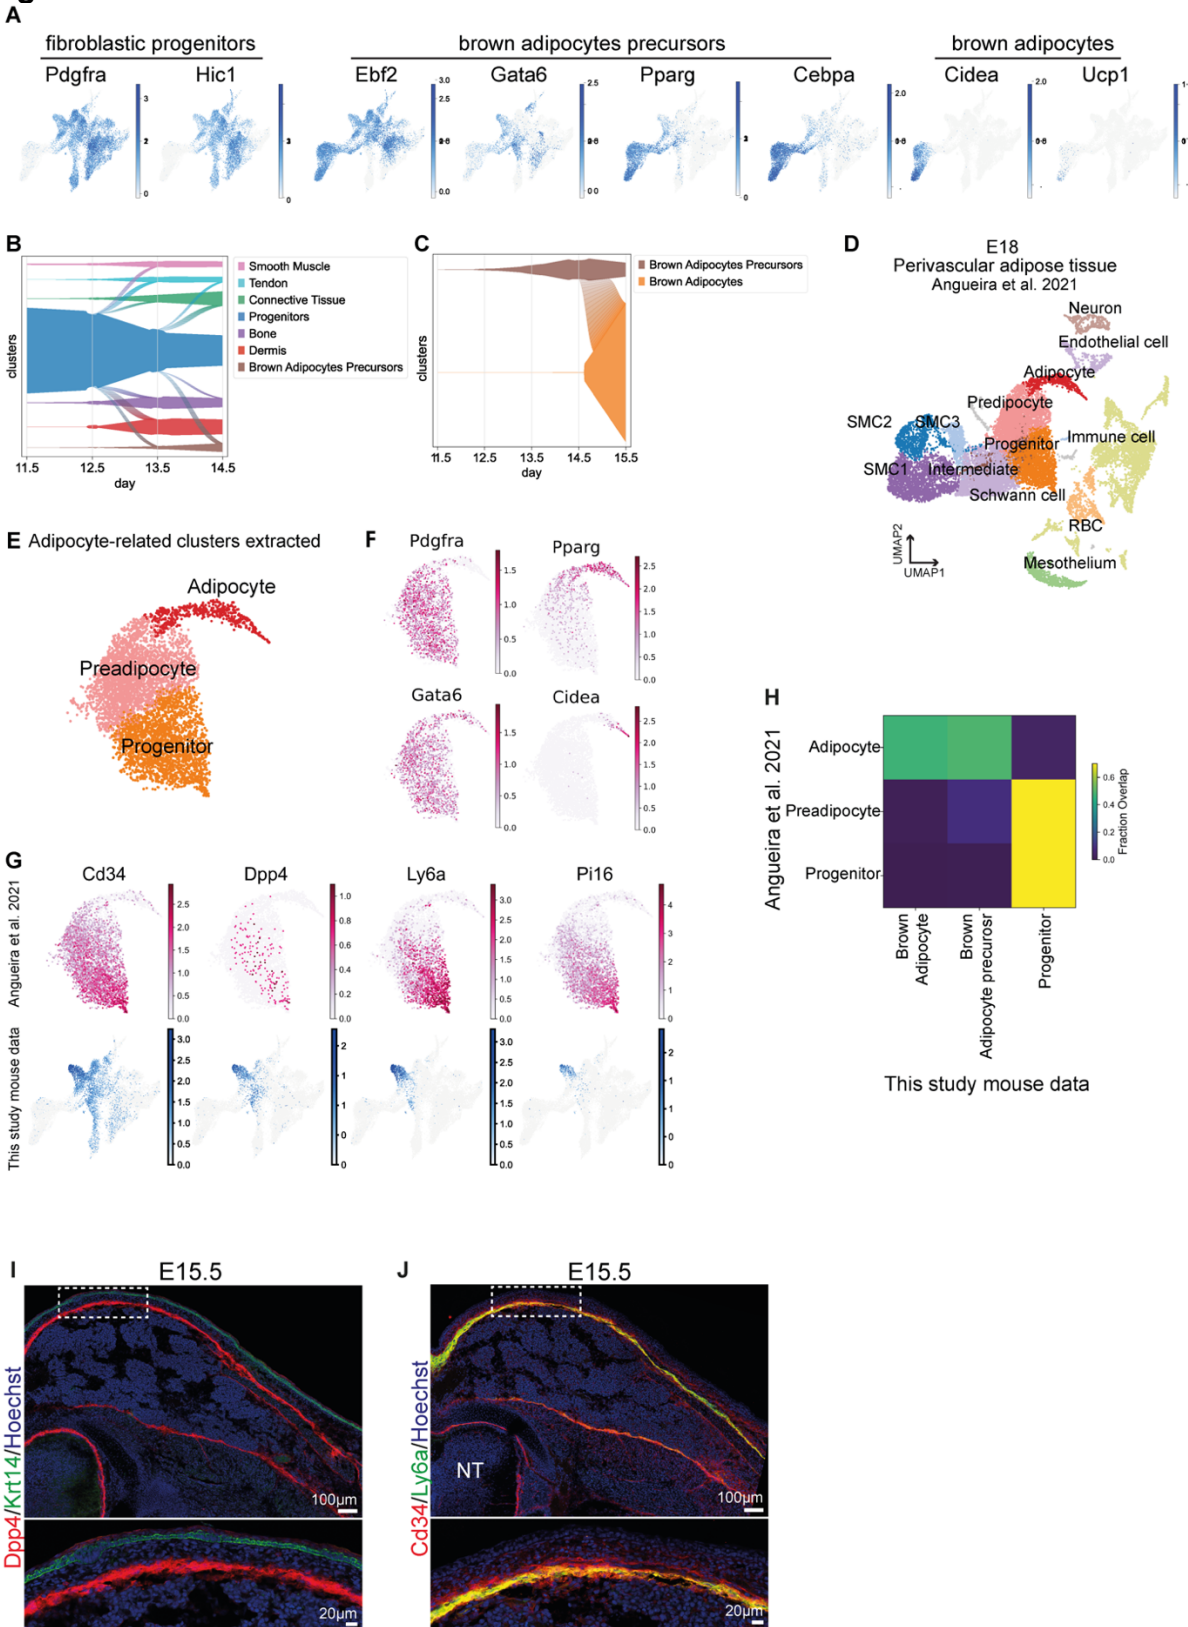



## **Figure S2 - Gata6 is expressed by developing BA precursors**

Related to Figure 1 and Figure 2

**A** – UMAP embedding showing expression of a curated list of cluster-specific genes. UMAP plots are colored by log-normalized transcript counts.

**B** – Graph showing the probability mass flows from the progenitor cluster to the other indicated clusters as time increases based on waddington-OT transition matrix.

**C** – Graph showing how probability mass flows from the BAs precursors cluster to BA cluster as time increases based on waddington-OT transition matrix.

**D** – UMAP plot generated from mouse single cell transcriptomics data from the developing perivascular adipose tissue on embryonic day 18 described in Angueira et al. 2021. Cells were clustered using Leiden clustering.

**E** – UMAP plot generated from mouse single cell transcriptomics data from the developing mouse perivascular adipose tissue on embryonic day 18 described in Angueira et al. 2021. Cells were clustered using Leiden clustering and cell clusters representing the adipocyte lineage were selected.

**F** – UMAP plot showing gene expression patterns in adipogenic cells sub-setted from the single cell transcriptomics data from the developing perivascular adipose tissue on embryonic day 18 described in Angueira et al. 2021. Scale represents log-normalized transcript counts.

**G** – Heatmap showing gene expression patterns in adipogenic cells sub-setted from the single cell transcriptomics data from the developing perivascular adipose tissue on embryonic day 18 described in Angueira et al. 2021 and mouse dataset generated in this study. Scale represents log-normalized transcript counts.

**H** – Classifier based machine-learning classification of perivascular adipose cells. A kNN-classifier trained on mouse single cell clusters was used to predict identities of cell clusters described in Angueira et al. 2021 study. Heatmaps depict fraction of mouse cluster assignments for adipocyte, preadipocytes and progenitors identified in the perivascular adipose tissue. BA= BAs and BApre=BA precursors identified in this study.

**I** – Transverse section at the forelimb level of a E15.5 embryo stained for Dpp4 and Keratin 14 (Krt14) antibody to detect cells from BApre cluster. NT= Neural tube, n≥4, scale bar=100µm (upper panel), scale bar=20µm (lower panel).

**J** – Transverse section from the interscapular region of a E15.5 embryo showing coexpression of Ly6a/Sca1 and Cd34 using antibody staining. NT= Neural tube, n≥4, scale bar=100µm (upper panel), scale bar=20µm (lower panel).

**Figure S3**

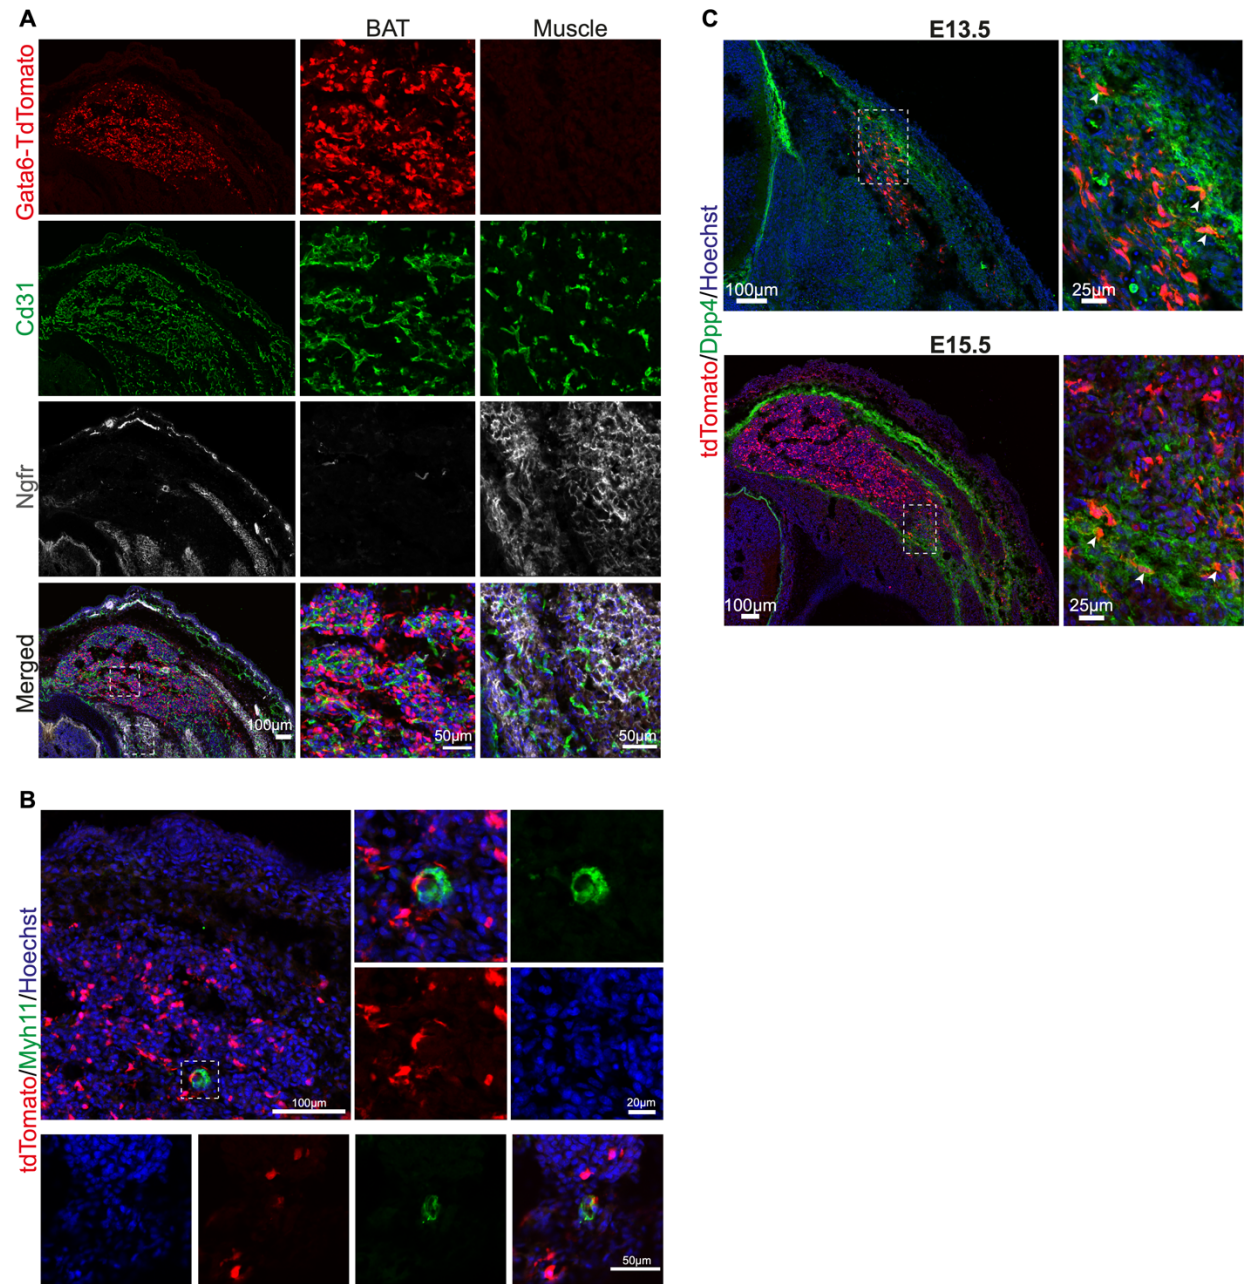

### **Figure S3 - Gata6 is expressed by developing BA precursors**

Related to Figure 2

**A** – Transverse section of Gata6-CreERT2:Rosa26-tdTomato E15.5 embryo at the forelimb level showing contribution of Gata6-Cre tdTomato positive cells in brown fat and muscle area,  $n \geq 3$ , scale bar=100 $\mu\text{m}$  (left panel), scale bar=50 $\mu\text{m}$  (inset panel).

**B** – Two representative images of RFP positive Gata6-tdTomato and Myh11 positive smooth muscle cells in E15.5 embryo at the forelimb level, scale bar=100 $\mu\text{m}$ . Inset shows magnified image, scale bar=20 $\mu\text{m}$ ,  $n \geq 3$ .

**C** – Transverse section of Gata6-CreERT2:Rosa26-tdTomato embryo at the forelimb level showing tdTomato and Dpp4 double positive cells at E13.5 and E15.5  $n \geq 3$ , scale bar=100 $\mu\text{m}$  (left panel), scale bar=20 $\mu\text{m}$  (inset panel).

**Figure S4**

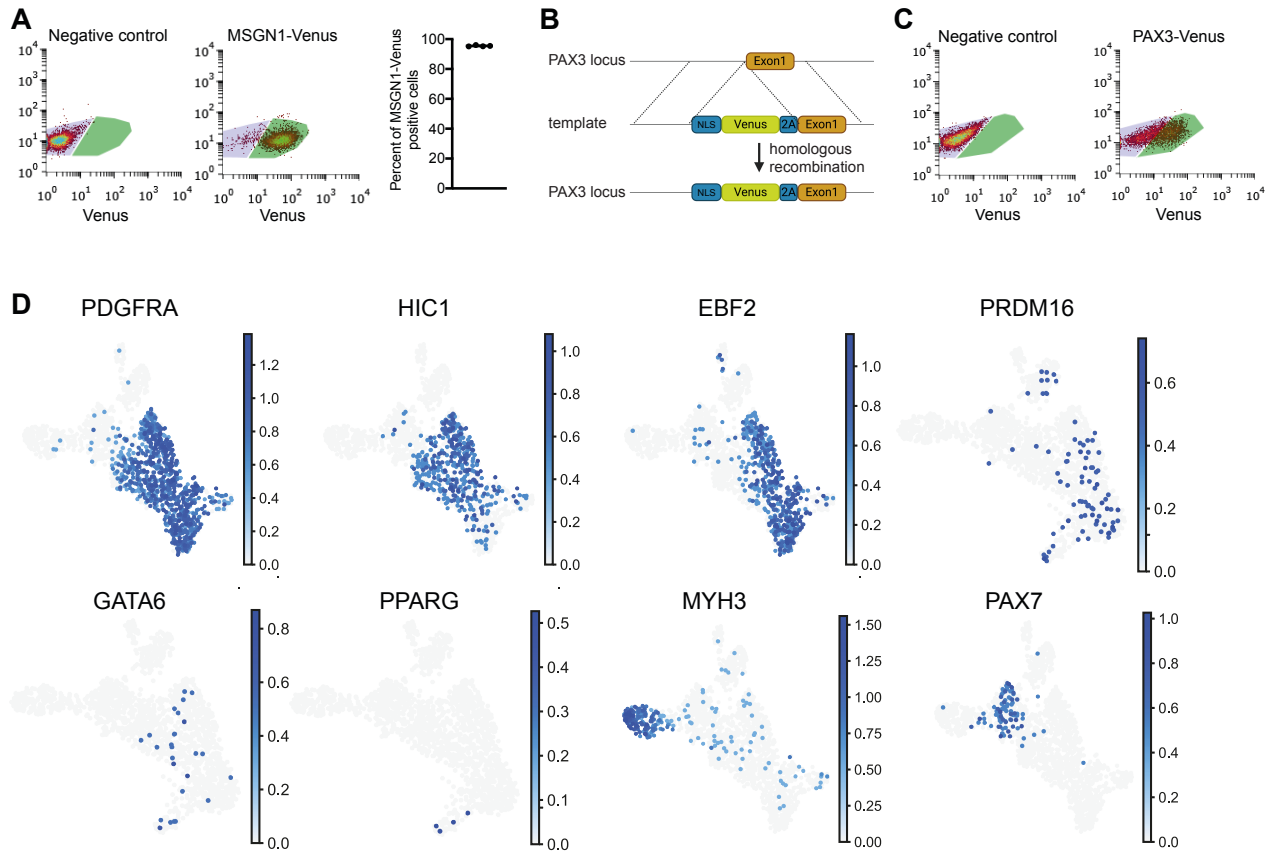

## **Figure S4 - Development of human BA precursors in vitro**

Related to Figure 4

**A** – Flow cytometry analysis of day 2 of differentiating iPSC cultures to measure fraction of Mesogenin-Venus positive cells. Mean  $\pm$  SD, n=4.

**B** – Schematic illustrating gene targeting strategy to generate PAX3-Venus knock-in iPSC line.

**C** – Representative flow cytometry plots showing gating strategy for quantifying PAX3-Venus positive cells on day 8 of differentiation.

**D** – UMAP embedding showing expression of a curated list of cluster-specific genes in human culture at day 20.

**Figure S5**

| A | Term                                   | P-value   | Genes                                                                                                                                |
|---|----------------------------------------|-----------|--------------------------------------------------------------------------------------------------------------------------------------|
|   | ECM-receptor interaction               | 5.680E-10 | ITGB1;TNXB;ITGB5;ITGB3;FN1;LAMB1;LAMC1;THBS2;THBS1;THBS3;COL1A1;COL1A2;COL6A2;COL6A1;COL6A3;COL6A6;CD47;CD44                         |
|   | Protein digestion and absorption       | 2.451E-07 | COL16A1;COL14A1;ELN;COL12A1;DPP4;COL1A1;COL3A1;COL1A2;COL5A1;COL5A3;COL6A2;COL5A2;COL6A1;COL8A2;COL6A3;COL6A6                        |
|   | PI3K-Akt signaling pathway             | 3.281E-06 | ITGB1;TNXB;CSF1;ITGB5;ITGB3;LPAR1;LPAR4;LAMC1;THBS2;THBS1;HSP90B1;THBS3;CCND3;CREB3L1;CREB3L2;AKT1;PDGFRA;FN1;LAMB1;IGF1;FGFR1;CREB5 |
|   | Axon guidance                          | 1.113E-03 | SEMA5A;ITGB1;SEMA3C;RYK;NTN1;ENAH;EFNB1;CXCL12;RRAS;DPYSL2;ABL1;PLXNB2;FYN;EPHB2;EPHB3                                               |
|   | Relaxin signaling pathway              | 6.399E-03 | COL1A1;JUN;COL3A1;COL1A2;CREB3L1;MMP2;CREB3L2;GNAS;AKT1;TGFB2;CREB5                                                                  |
|   | Regulation of actin cytoskeleton       | 6.399E-03 | ITGB1;PDGFRA;GSN;ITGB5;ARPC1B;ITGB3;LPAR1;FN1;LPAR4;ENAH;CXCL12;RRAS;TMSB4X;MYH10;FGFR1                                              |
|   | Thyroid hormone synthesis              | 7.738E-03 | HSPA5;GPX3;CREB3L1;CREB3L2;GNAS;GPX7;CREB5;HSP90B1                                                                                   |
|   | TGF-beta signaling pathway             | 2.749E-02 | FST;NBL1;LTBP1;THBS1;DCN;THSD4;TGFB2;FBN1                                                                                            |
|   | Rap1 signaling pathway                 | 2.749E-02 | ITGB1;PDGFRA;CSF1;ITGB3;LPAR1;LPAR4;IGF1;THBS1;ENAH;RRAS;GNAS;AKT1;FGFR1                                                             |
|   | Various types of N-glycan biosynthesis | 2.863E-02 | RPN2;MAN2A1;RPN1;STT3A;DDOST                                                                                                         |
|   | Osteoclast differentiation             | 4.460E-02 | JUN;JUND;CSF1;ITGB3;CTSK;AKT1;FYN;SQSTM1;TGFBR2                                                                                      |
|   | TNF signaling pathway                  | 6.499E-02 | JUN;MMP14;VCAM1;CSF1;CREB3L1;CREB3L2;AKT1;CREB5                                                                                      |
|   | N-Glycan biosynthesis                  | 6.552E-02 | RPN2;MAN2A1;RPN1;STT3A;DDOST                                                                                                         |
|   | Wnt signaling pathway                  | 7.123E-02 | TCF7L2;CCND3;SFRP1;JUN;TCF7L1;SFRP2;FZD2;RYK;SERPINF1;DKK2                                                                           |
|   | Glutathione metabolism                 | 9.695E-02 | GSTM1;GPX3;ANPEP;GPX7;GSTM5                                                                                                          |

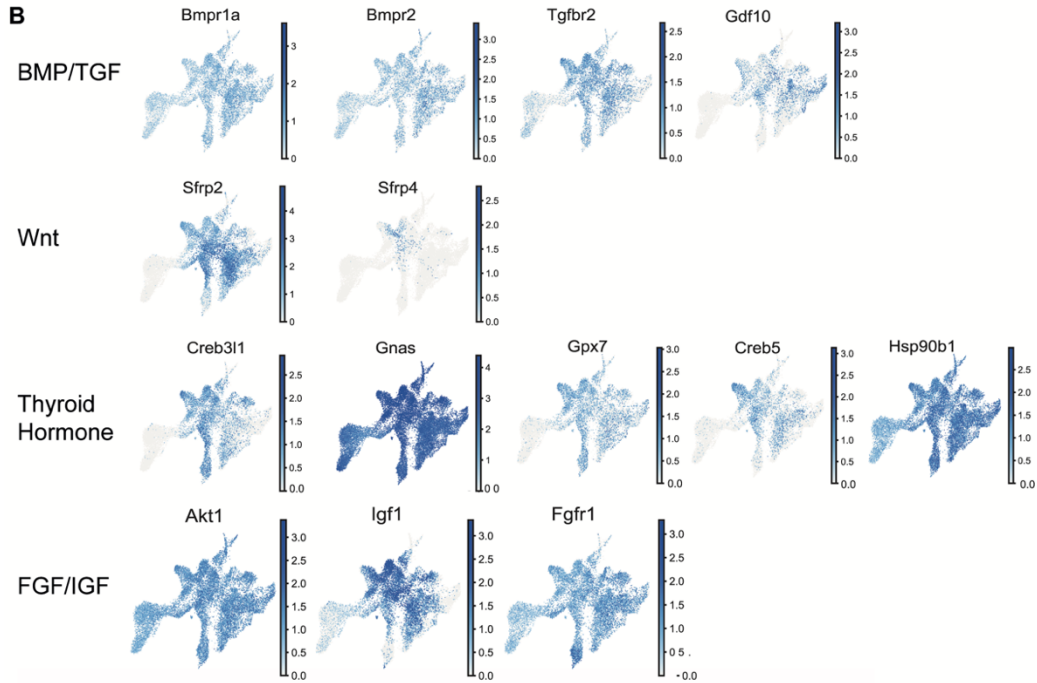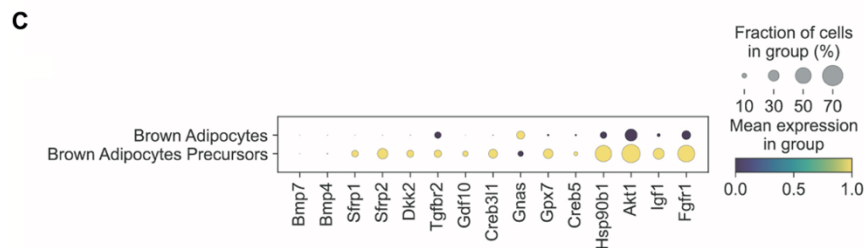

## **Figure S5 - Differentiation of human mature BA in vitro**

Related to Figure 4

**A** – List of KEGG signaling pathway analysis using EnrichR. Differentially expressed genes in BApre cluster in mouse transcriptomics data were used as an input.

**B** – UMAP plots showing expression patterns of genes involved in BMP/Tgfb, Wnt, thyroid hormone and FGF/IGF signaling in mouse temporal single cell data. Scale represents log-normalized transcript counts.

**C**-Dot plots showing expression patterns of genes involved in BMP/Tgfb, Wnt, thyroid hormone and FGF/IGF signaling in mouse temporal single cell data.



**Figure S6**

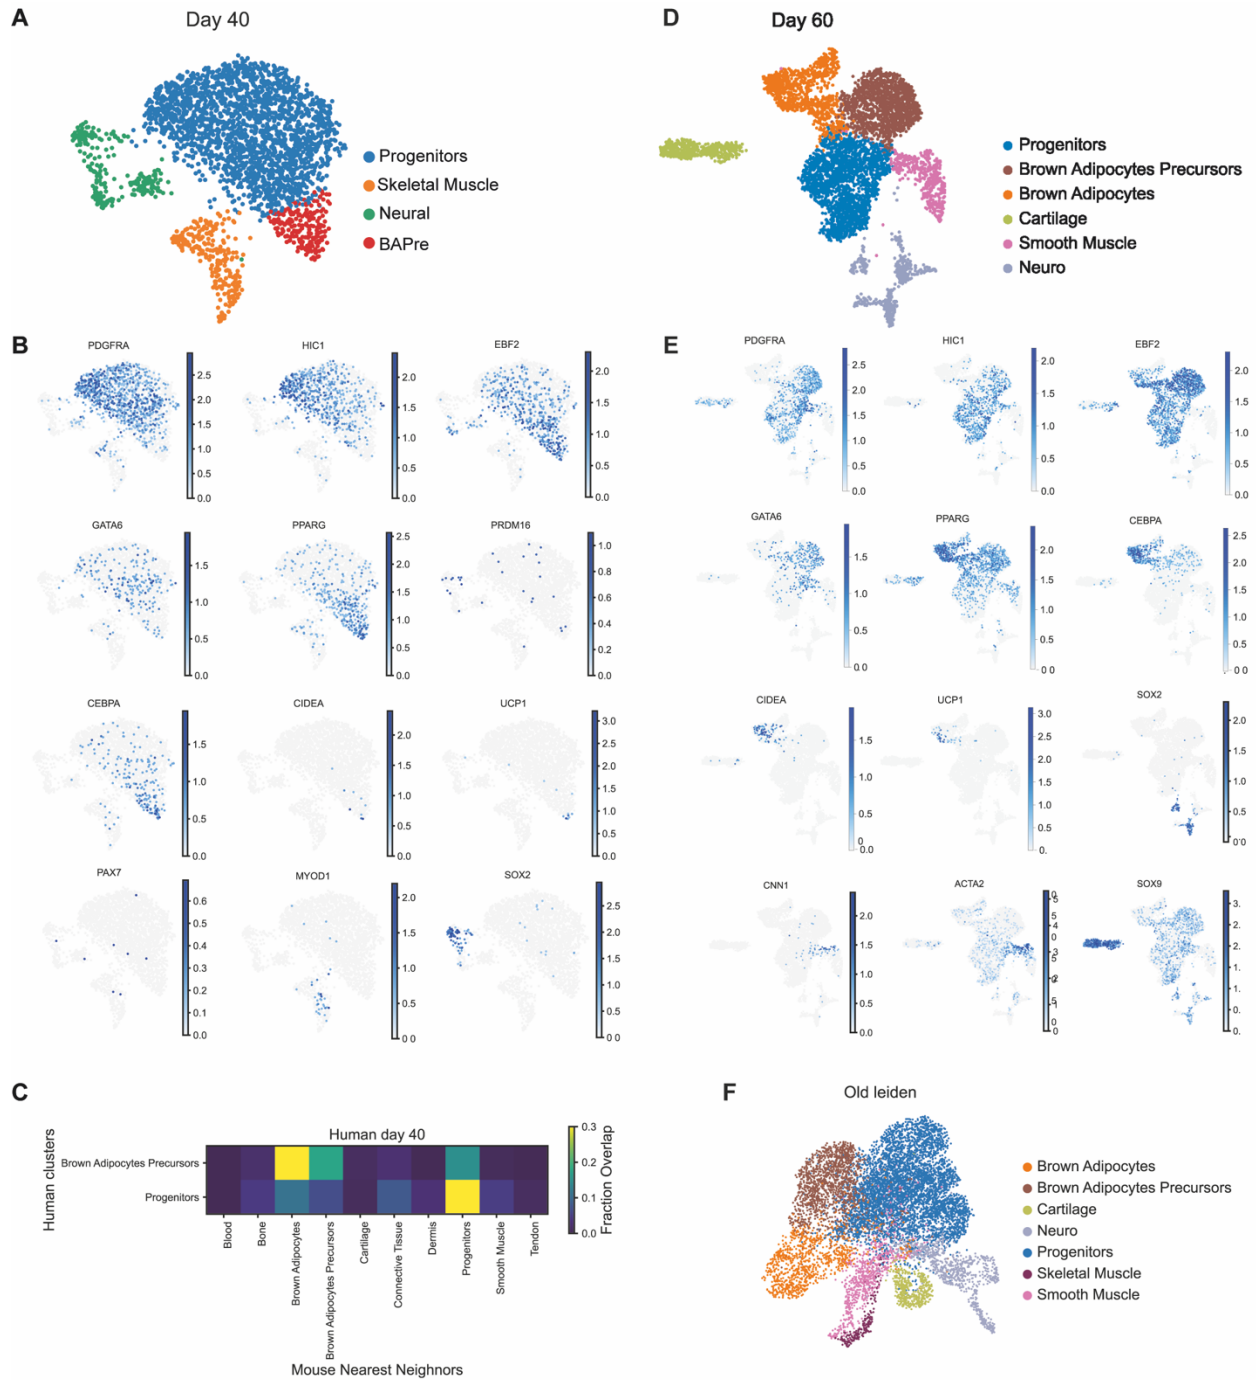

## **Figure S6 - ScRNAseq analysis of human BA generated in vitro**

Related to Figure 6

**A** – UMAP embedding showing cell clusters identified using Leiden based clustering on human culture at d40. Colors indicate identified cell cluster.

**B** – UMAP embedding showing expression of a curated list of cluster-specific genes in human culture at d40.

**C** – Machine-learning classification of human in-vitro cultured cells and mouse embryo. A k-NN classifier trained on clusters of mouse clusters was used to predict identities of the human in-vitro cultured progenitors and BAs precursors.

**D** – UMAP embedding showing expression of a curated list of cluster-specific genes in human culture at d60.

**E** – Projection of the cell identities obtained from clustering analyses of individual time points onto the UMAP of the dataset combining the three time points.

**F** – UMAP embedding showing cell clusters identified using Leiden based clustering on the human in-vitro cultured cells at d20, 40 and 60 merged. Colors indicate identified cell cluster in individual time point analysis.

**Figure S7**

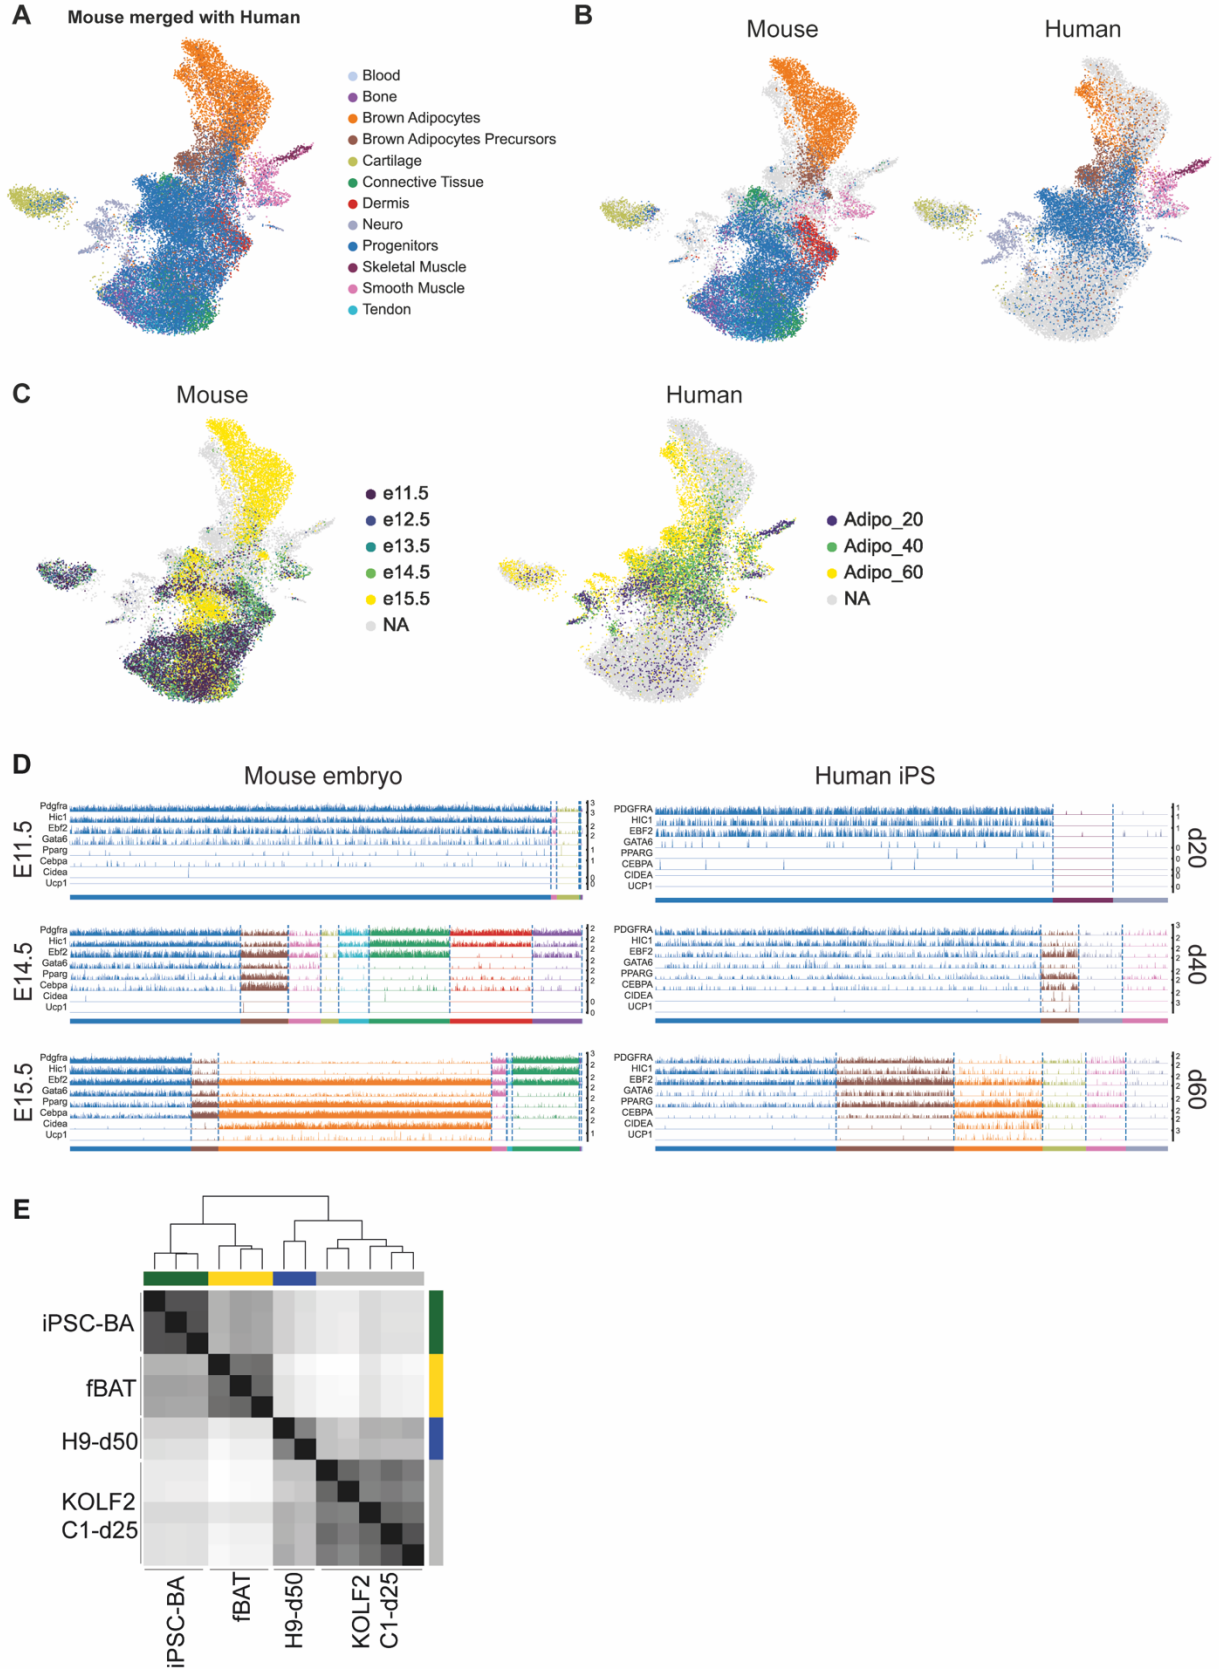

## **Figure S7 - Human BA generated *in vitro* are functional**

Related to Figure 7

**A** – Merged UMAP embedding of the single cells isolated from day 20, 40 and 60 of human culture and E11.5, E12.5, E13.5, E14.5, E15.5 mouse embryos. Colors indicate both human and mouse clusters.

**B** – Merged UMAP embedding of the single cells isolated from day 20, 40 and 60 of human culture and E11.5, E12.5, E13.5, E14.5, E15.5 mouse embryos. Colors indicate mouse clusters (left) and human clusters (right).

**C** – Merged UMAP embedding of the single cells isolated from day 20, 40 and 60 of human culture and E11.5, E12.5, E13.5, E14.5, E15.5 mouse embryos. Colors indicate mouse embryonic days (left) and human culture days (right).

**D** – Comparison of tracksplots showing expression of marker genes of the BA lineage in the mouse embryo at different stages (left) and in human cultures at different days (right) in the clusters identified in Figure 1A and Figure 6C respectively.

**E** – Matrix plot showing transcriptional overlap between brown adipose specific genes in iPSC derived BAs (iPSC-BA), human fetal BAT (fBAT), human embryonic stem cell derived BAs in Zhang et al (H9-d50) and iPSC derived BAs in Carobbio et al (KOLF2-C1-d25).
